# Supplementary material for: A Cu(II) MOF with laccase-like activity for colorimetric detection of 2,4-dichlorophenol and p-nitrophenol
Source: Royal Society of Chemistry journal article supplement (doi:10.1039/d2dt03268f), 2023-01-01
Supplement: d2dt03268f1.pdf [file d2dt03268f1.pdf]

## A Cu(II) MOF with laccase-like activity for colorimetric detection of 2,4-dichlorophenol and p-nitrophenol

Baoru Wang, Peng Liu\*, Yixiao Hu, Haili Zhao, Liyan Zheng\* and Qiue Cao\*

School of Chemical Science and Technology, Yunnan University, No. 2 North Cuihu Road, Kunming, 650091, PR China.

\* Corresponding author, Email address: [pliu@ynu.edu.cn](mailto:pliu@ynu.edu.cn); [zhengliyan@ynu.edu.cn](mailto:zhengliyan@ynu.edu.cn); [qecao@ynu.edu.cn](mailto:qecao@ynu.edu.cn).

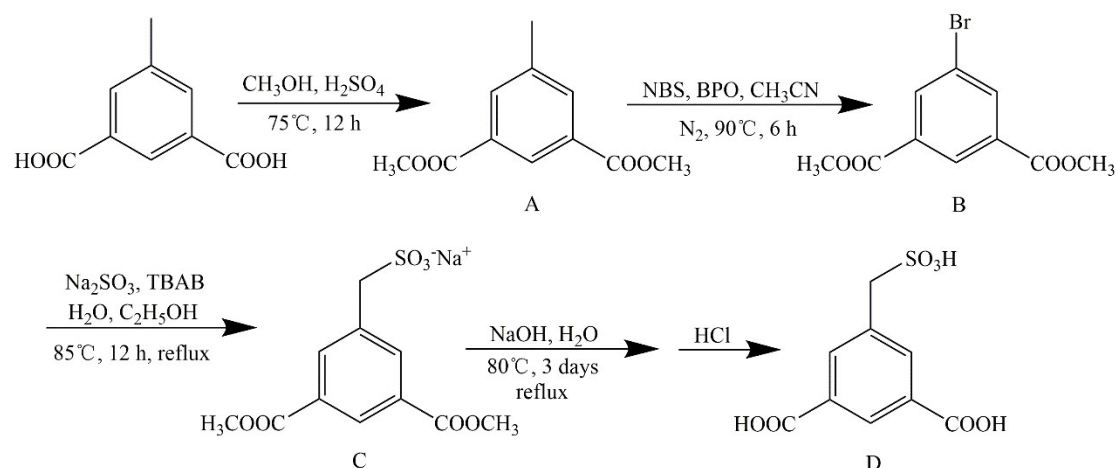

**Fig. S1** Synthesis of 5-sulfomethyl isophthalic acid (5-SMIPA).

Compound **A** (5-methyl isophthalate):  $\text{H}_2\text{SO}_4$  (4 mL) was slowly added to solution of 5-methylisophthalic acid (1.08 g, 6 mmol) in  $\text{CH}_3\text{OH}$  (20 mL) and resulting mixture stirred at  $75^\circ\text{C}$  for 12 h. When the reaction was end and cooled to room temperature, 10 M  $\text{NaOH}$  (aq) was added to neutralize the solution. Compound A was extracted by  $\text{CH}_2\text{Cl}_2$  (150 mL) and the  $\text{CH}_2\text{Cl}_2$  was removed by rotary evaporation to obtain compound A (1.17 g, 94.1%). NMR spectrum was shown in Fig. S2 and Fig. S3.

$^1\text{H}$  NMR (400 MHz, Chloroform-d)  $\delta$  8.48 (s, 1H), 8.04 (s, 2H), 3.94 (s, 6H), 2.45 (s, 3H).

$^{13}\text{C}$  NMR (400 MHz, Chloroform-d)  $\delta$  166.40, 138.67, 134.39, 130.47, 127.94, 52.27, 21.10.

Compound **B** (5-bromomethyl isophthalate): Compound A (0.832 g, 4 mmol) and  $\text{NBS}$  (0.783 g, 4 mmol) were dissolved in anhydrous  $\text{CH}_3\text{CN}$  (20 mL), then added the  $\text{CH}_3\text{CN}$  solution of  $\text{BPO}$  (0.09 g, 0.4 mmol). The mixture heated under reflux under  $\text{N}_2$  and stirred for 6 h. After 6 h quenched  $\text{BPO}$  with water, and removed solvent. The residue was purified by flash chromatography ( $\text{EtOAc}$  : petroleum ether, 1:20) to obtain compound B (0.75 g, 65.7%). NMR spectrum was shown in Fig. S4 and Fig. S5.

$^1\text{H}$  NMR (400 MHz, Chloroform-d)  $\delta$  8.60 (s, 1H), 8.26 (s, 2H), 4.55 (s, 2H), 3.96 (s, 6H).

$^{13}\text{C}$  NMR (400 MHz, Chloroform-d)  $\delta$  165.55, 138.83, 134.18, 131.29, 130.51, 52.52, 31.50.

Compound **C** (5-sulfomethyl isophthalate): Added compound B (0.28 g, 1 mmol),  $\text{Na}_2\text{SO}_3$  (0.15 g,

1.2 mmol), TBAB (0.008g, 0.025 mmol) to a mixture of H<sub>2</sub>O and ethanol and stirred for 12 h. The solvent was evaporated to obtain a mixed solid.

Compound **D** (5-sulfomethyl isophthalic acid, 5-SMIPA): Added mixed solid, NaOH (0.64 g, 16 mmol) to water and stirred at 85 °C for 3 days. Then added HCl to adjust pH to neutral conditions, the white solid precipitated was compound D (0.16 g). NMR spectrum was shown in Fig. S6 and Fig. S7.

<sup>1</sup>H NMR (600 MHz, MeOD), δ (TMS, ppm) 8.50 (1H, s), 8.07 (2H, s), 4,13 (2H, s).

<sup>13</sup>C NMR (600 MHz, MeOD), δ (TMS, ppm) δ 173.82, 137.56, 132.76, 132.17, 128.92, 56.94.

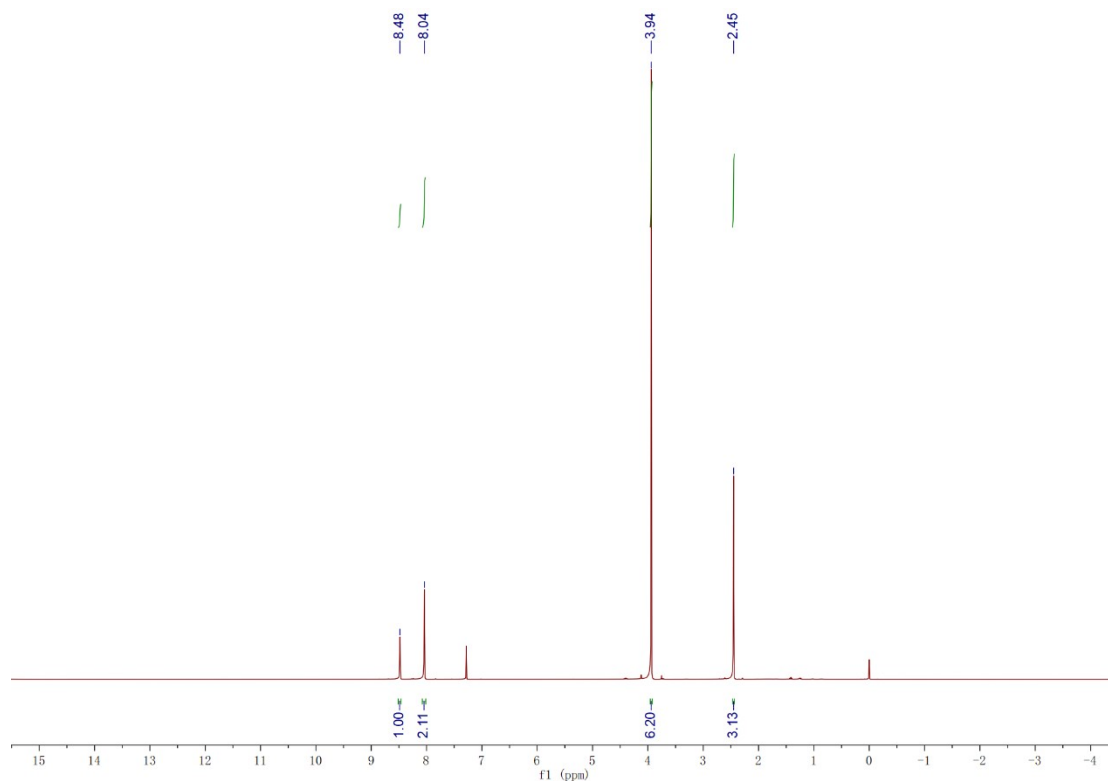

**Fig. S2.** <sup>1</sup>H NMR (400 MHz, Chloroform-d) spectrum of 5-methyl isophthalate.

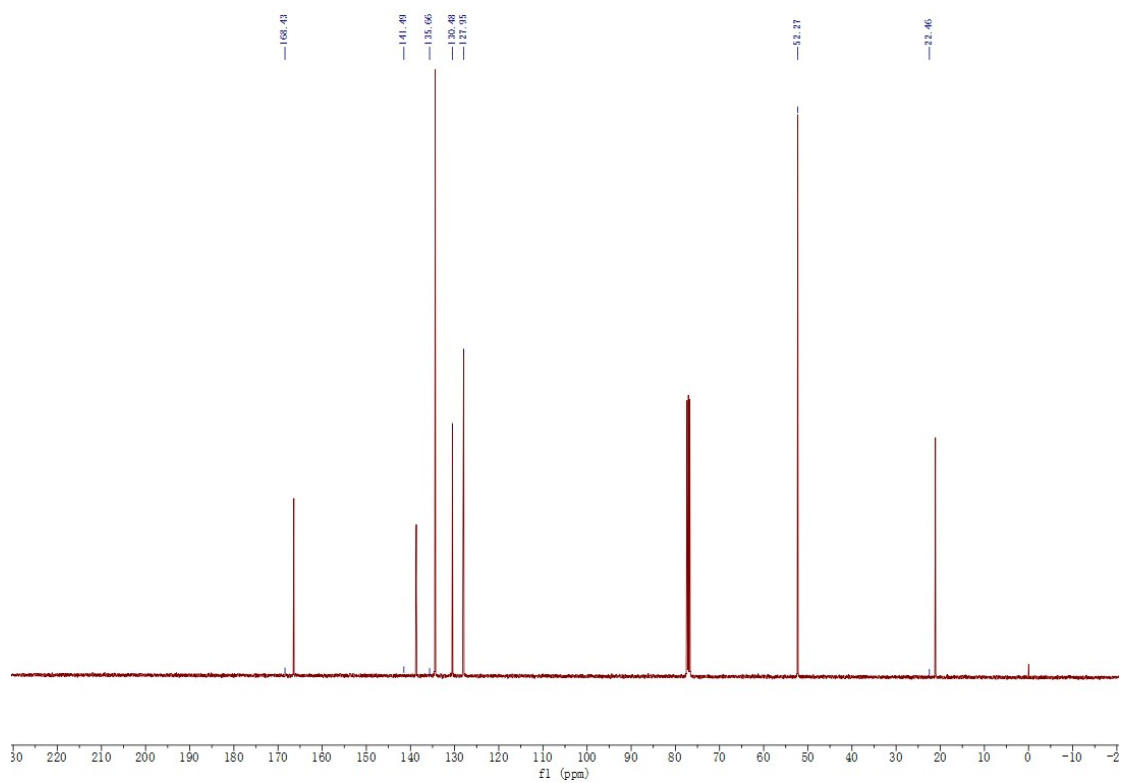

**Fig. S3.**  $^{13}\text{C}$  NMR (400 MHz, Chloroform-d) spectrum of 5-methyl isophthalate.

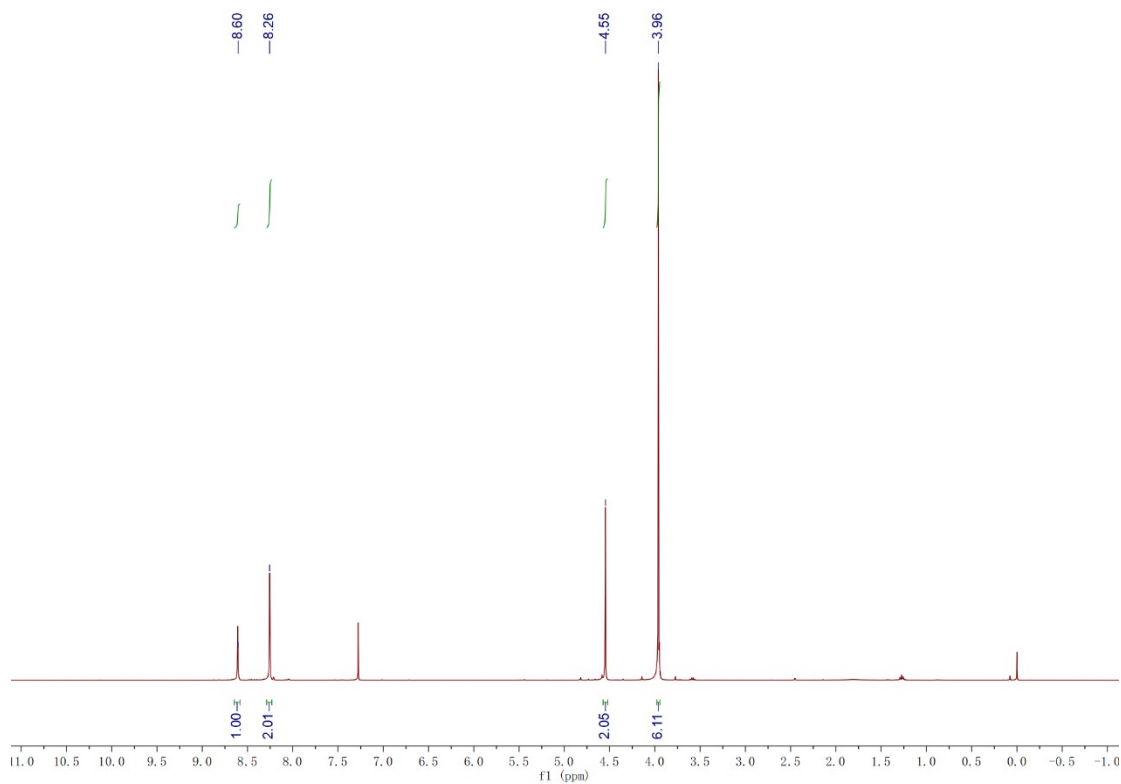

**Fig. S4.**  $^1\text{H}$  NMR (400 MHz, Chloroform-d) spectrum of 5-bromomethyl isophthalate.

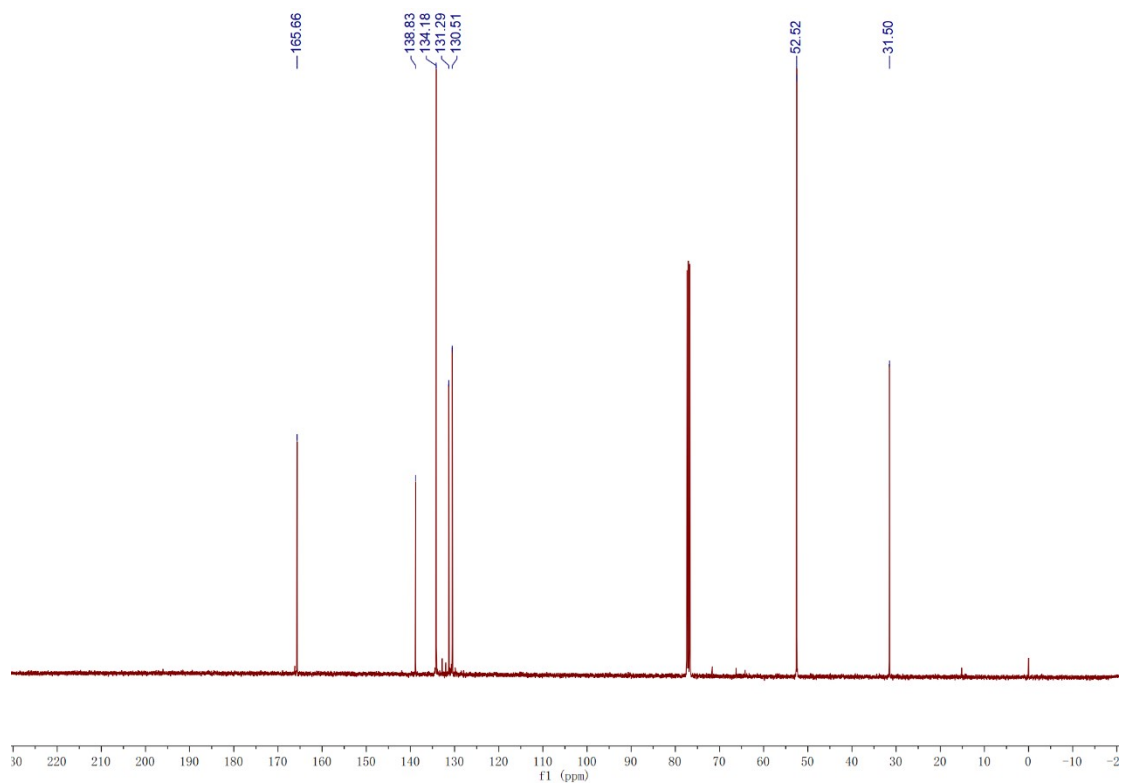

**Fig. S5.**  $^{13}\text{C}$  NMR (400 MHz, Chloroform-d) spectrum of 5-bromomethyl isophthalate.

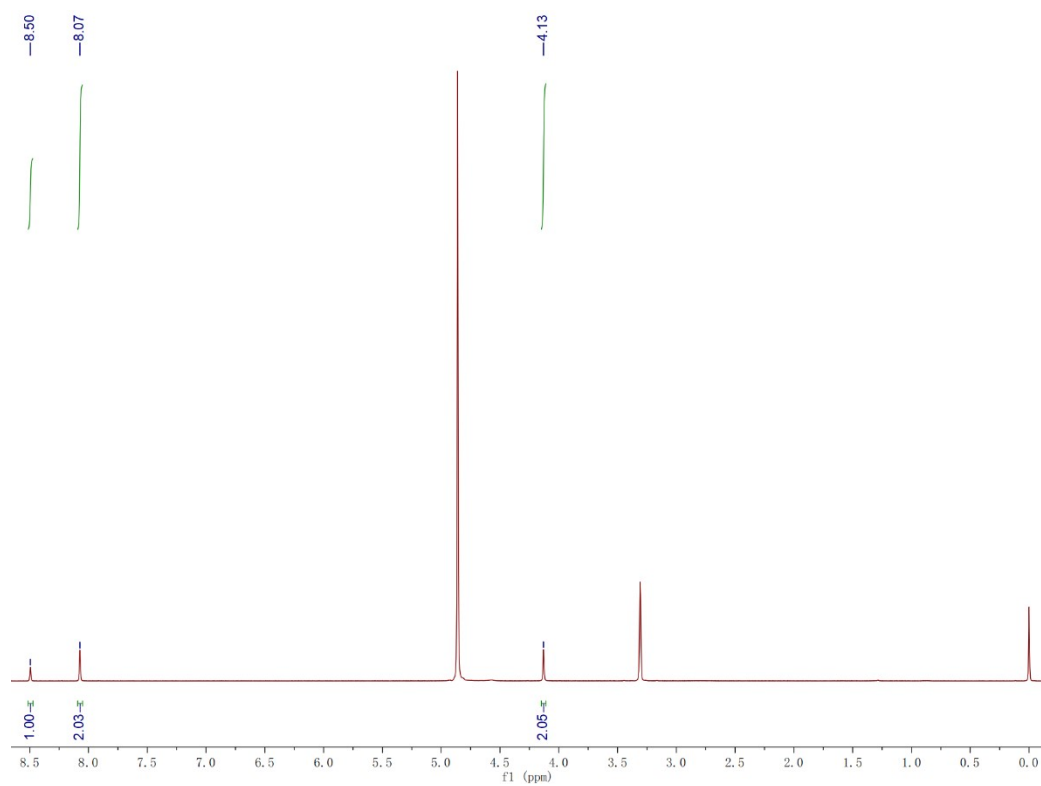

**Fig. S6.**  $^1\text{H}$  NMR (600 MHz, MeOD) spectrum of 5-sulfomethyl isophthalic acid (5-SMIPA).

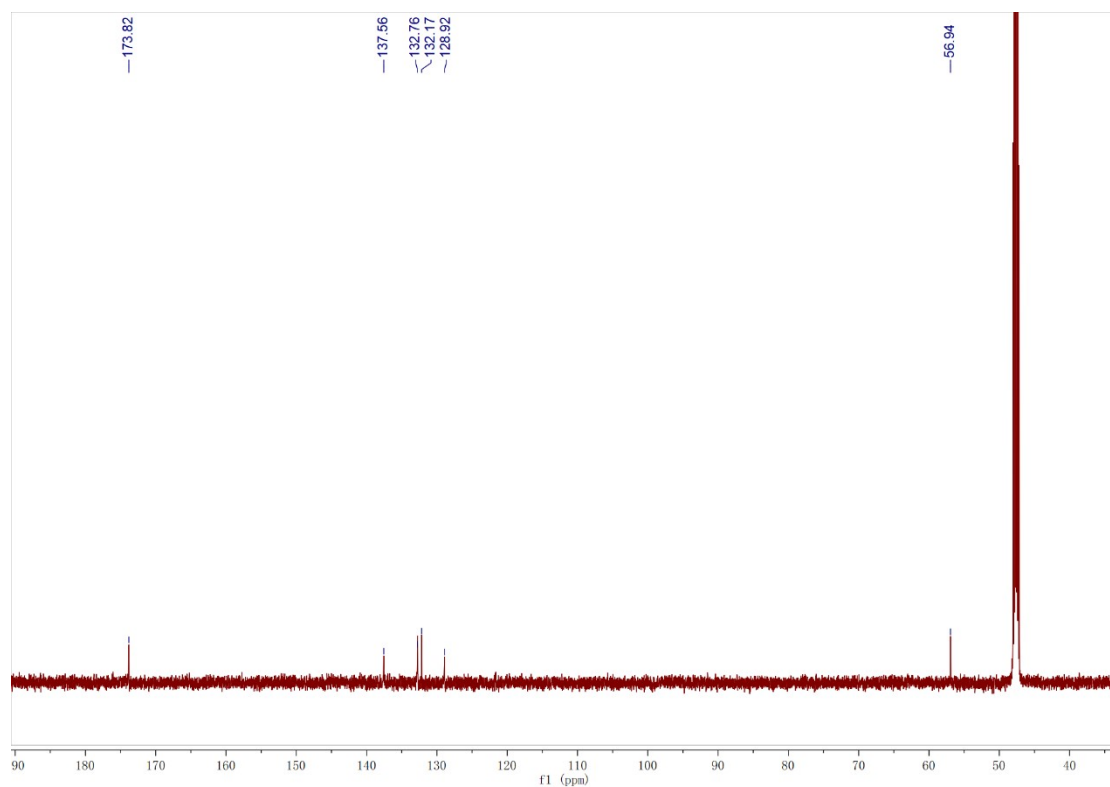

**Fig. S7.**  $^{13}\text{C}$  NMR (600 MHz, MeOD) spectrum of 5-sulfomethyl isophthalic acid (5-SMIPA).

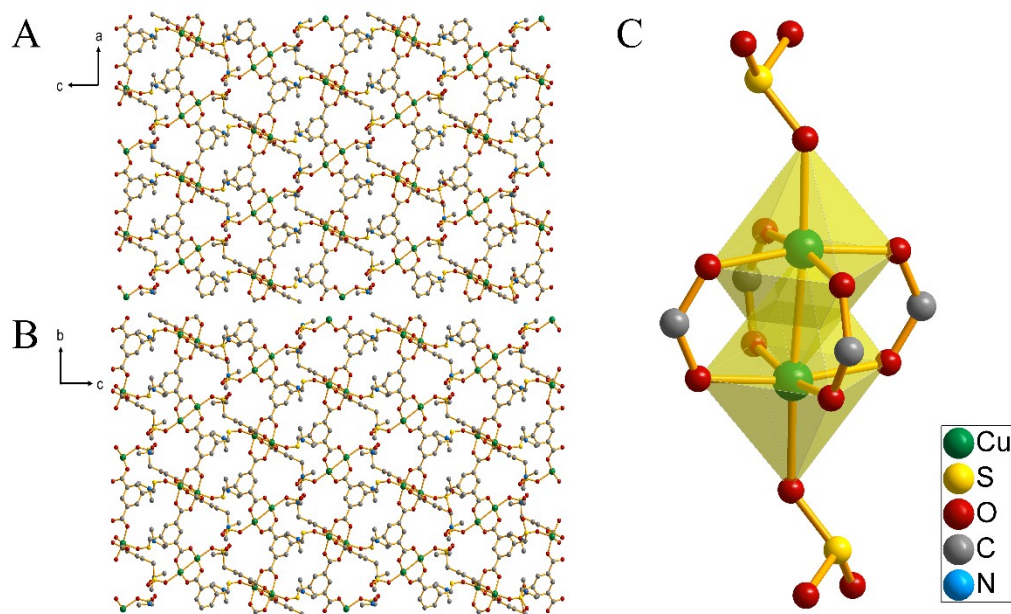

**Fig. S8.** (A) Crystal packing pattern along the b axis. (B) Crystal packing pattern along the a axis. (C) Specific coordination environment of Cu.

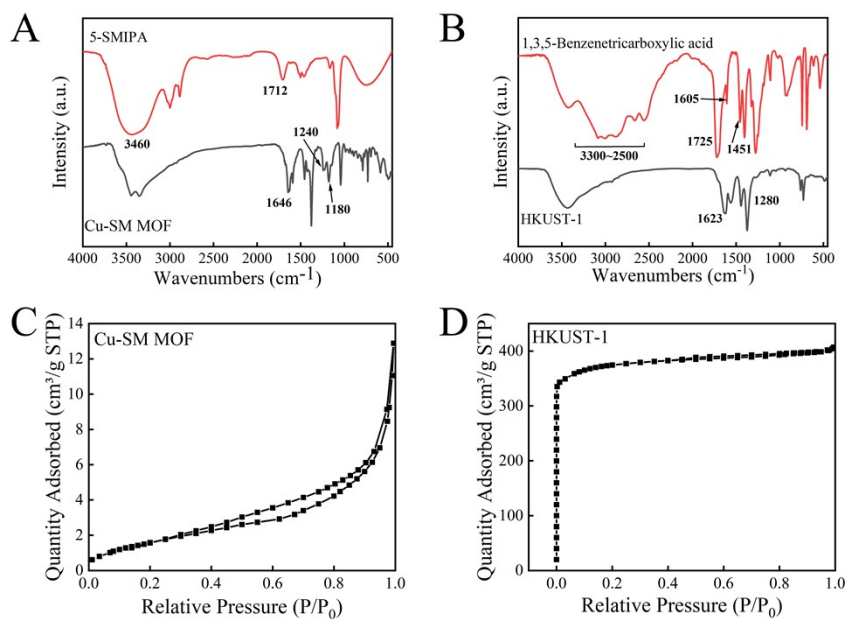

**Fig. S9.** (A) FTIR spectra of Cu-SM MOF and 5-SMIPA. (B) FTIR spectra of HKUST-1 and 1,3,5-benzenetricarboxylic acid. (C) N<sub>2</sub> adsorption isotherm of the Cu-SM MOF after drying to measure the specific surface area. (D) N<sub>2</sub> adsorption isotherm of the HKUST-1 after drying to measure the specific surface area.

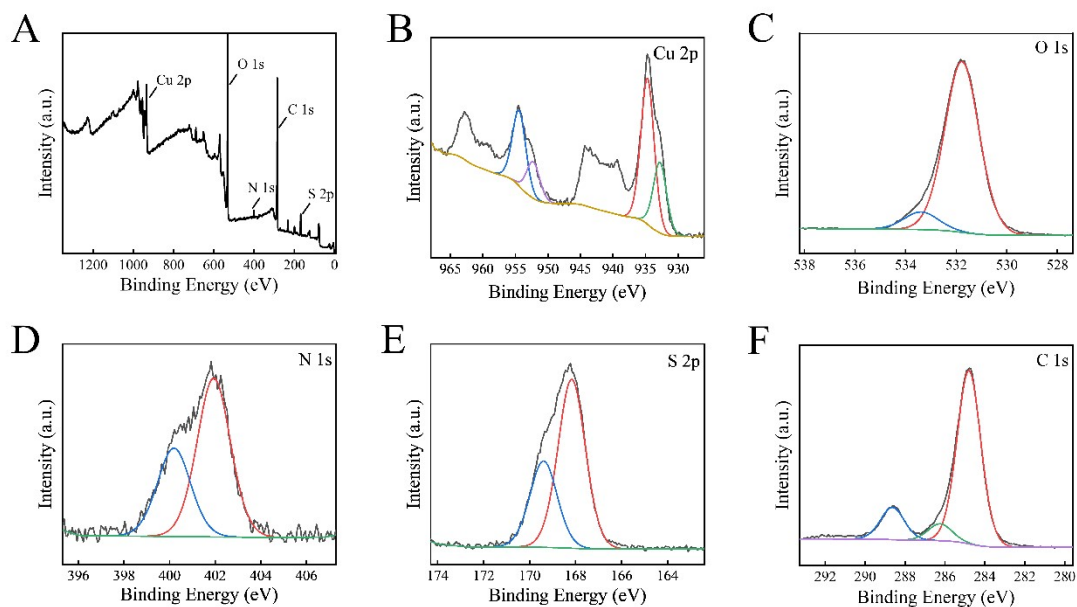

**Fig. S10.** (A) XPS spectra of Cu-SM MOF. High-resolution (B) Cu 2p, (C) O 1s, (D) N 1s, (E) S 2p, (F) C 1s.

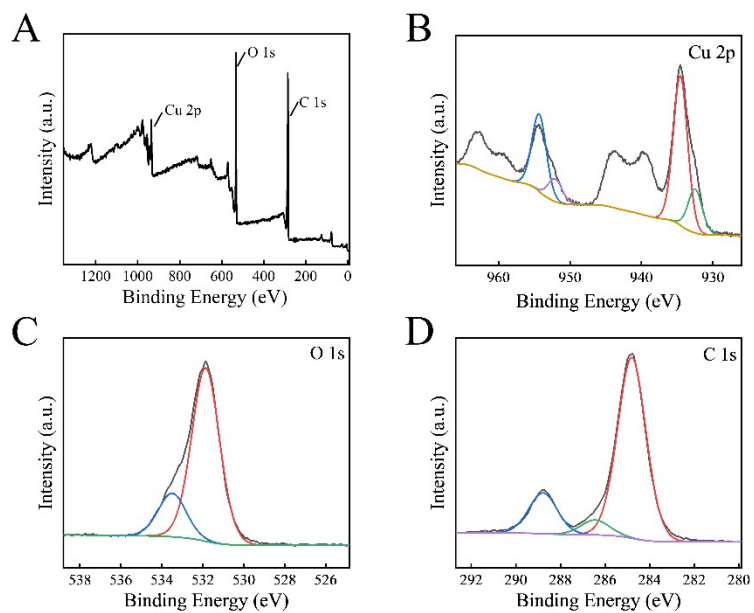

**Fig. S11.** (A) XPS spectra of HKUST-1. High-resolution (B) Cu 2p, (C) O 1s, (D) C 1s.

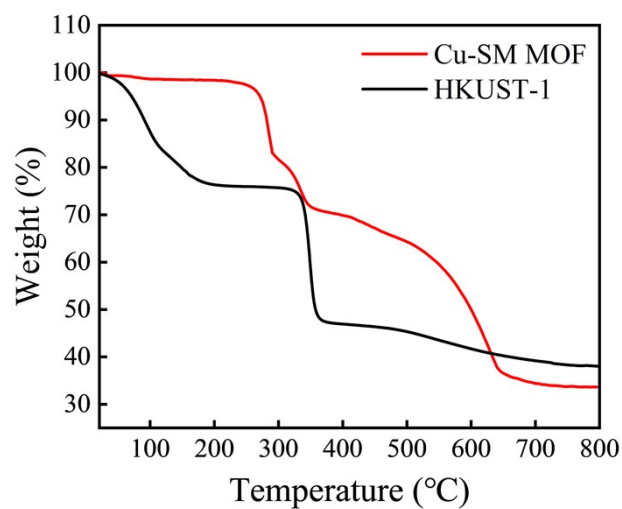

**Fig. S12.** TGA curves of Cu-SM MOF (red curve) and HKUST-1 (black curve).

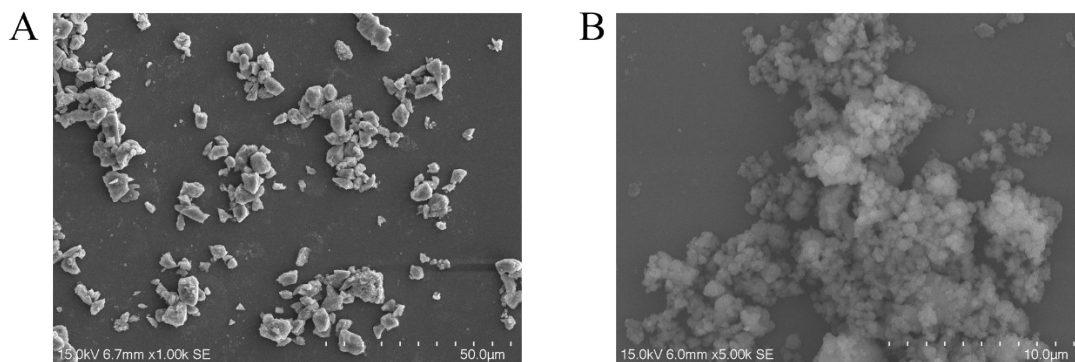

**Fig. S13.** SEM images of (A) Cu-SM MOF and (B) HKUST-1 after grinding.

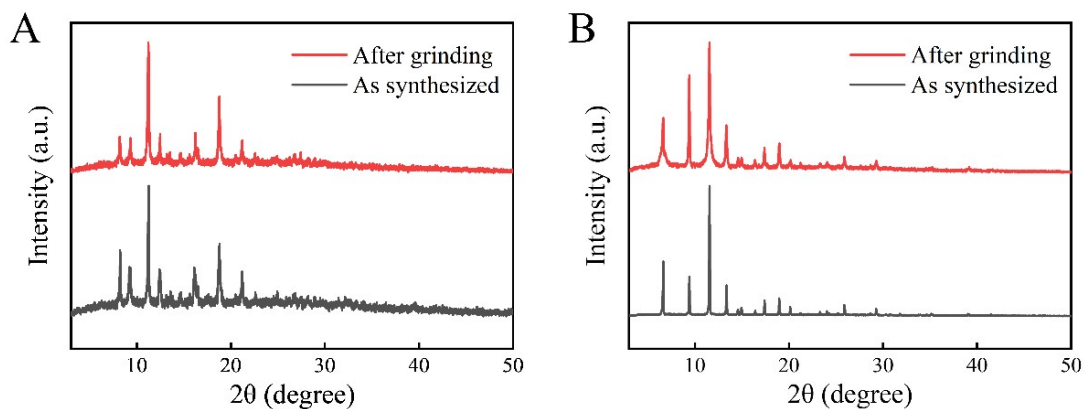

**Fig. S14.** PXRD patterns of (A) Cu-SM MOF and (B) HKUST-1 after grinding.

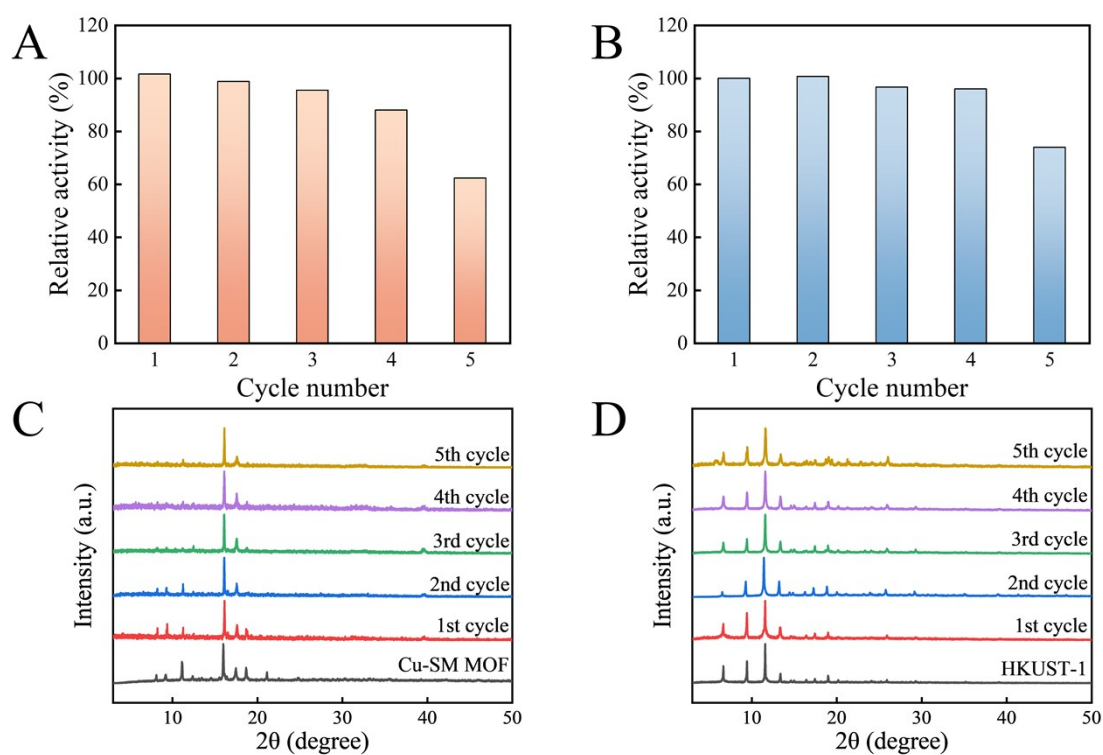

**Fig. S15.** Catalytic efficiency of (A) Cu-SM MOF and (B) HKUST-1 during the recycling experiment up to the 5th cycle. PXRD patterns of (C) Cu-SM MOF and (D) HKUST-1 during the recycling experiment up to the 5th cycle.



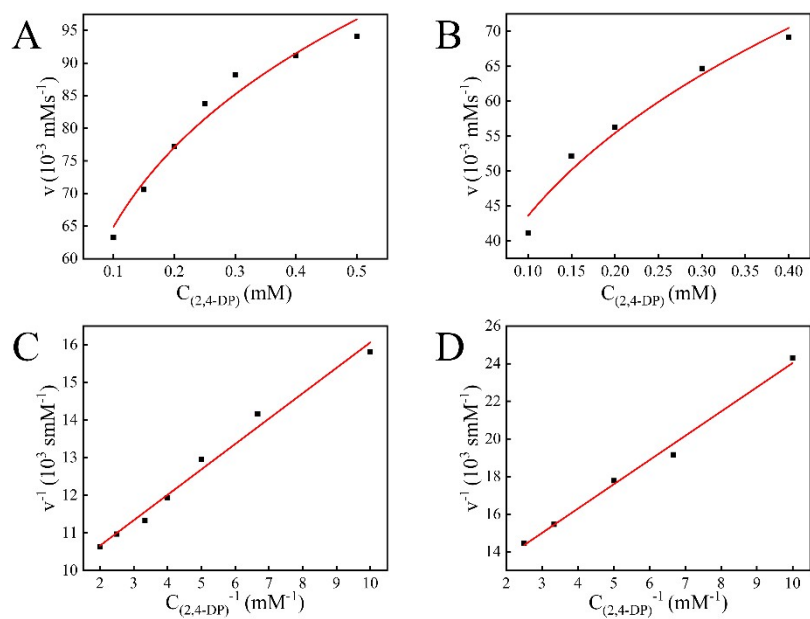

**Fig. S16.** Plot of absorbance at 510 nm obtained from the time-dependent kinetic data at various concentrations of 2,4-DP, (A) Cu-SM MOF, (B) HKUST-1. Lineweaver-Burk plot of (C) Cu-SM MOF, (D) HKUST-1.

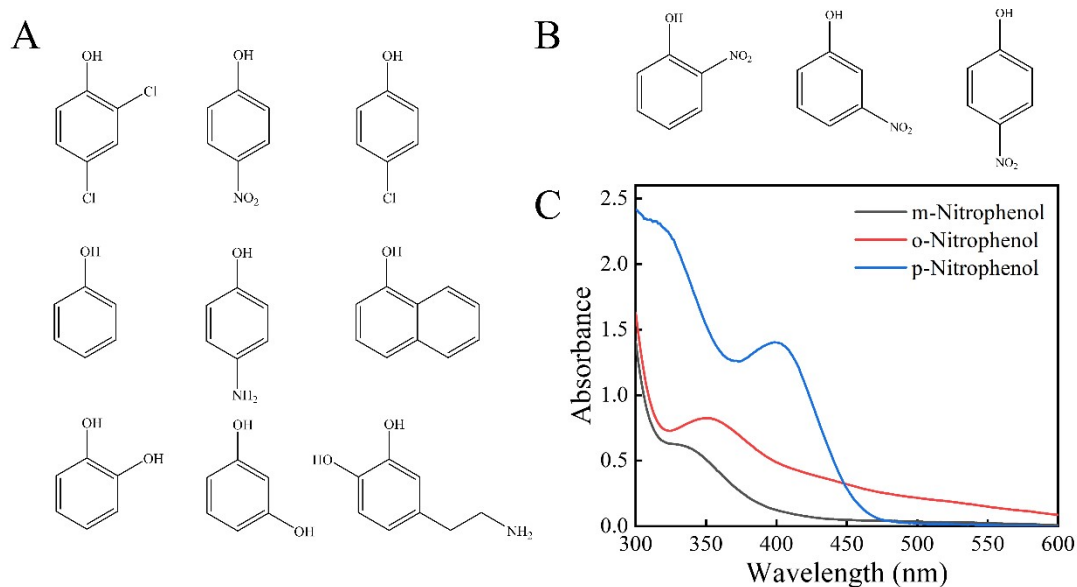

**Fig. S17.** (A) Structure of a variety of phenolic compounds. (B) Structure of three nitrophenols. (C) Oxidation of three nitrophenols catalyzed by Cu-SM MOF.

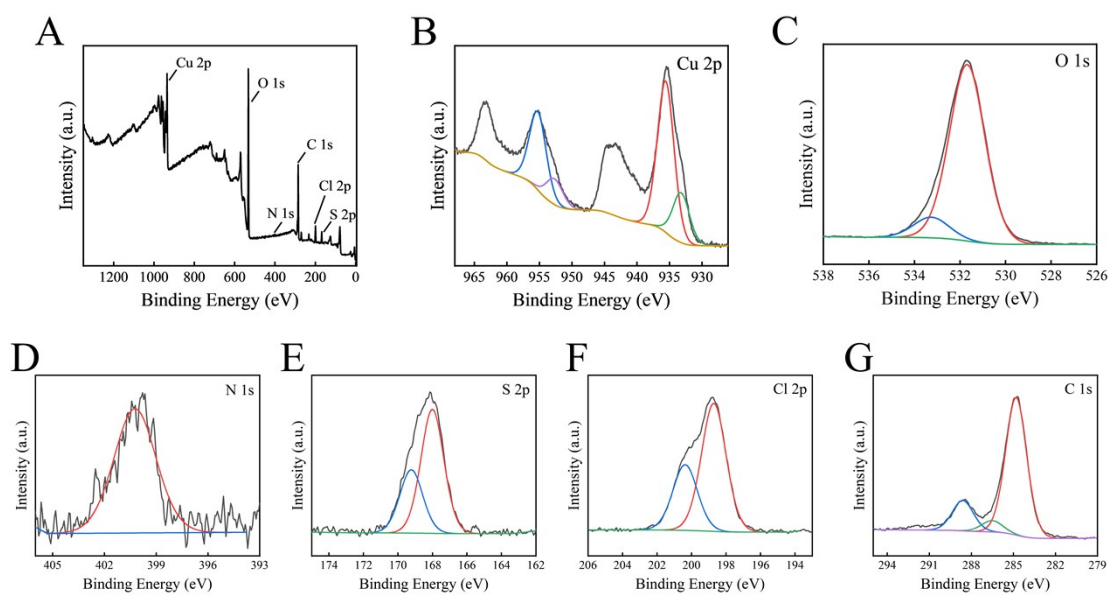

**Fig. S18.** (A) XPS spectra of Cu-SM MOF incubated with 2,4-DP. High-resolution (B) Cu 2p, (C) O 1s, (D) N 1s, (E) S 2p, (F) Cl 2p, (G) C 1s.

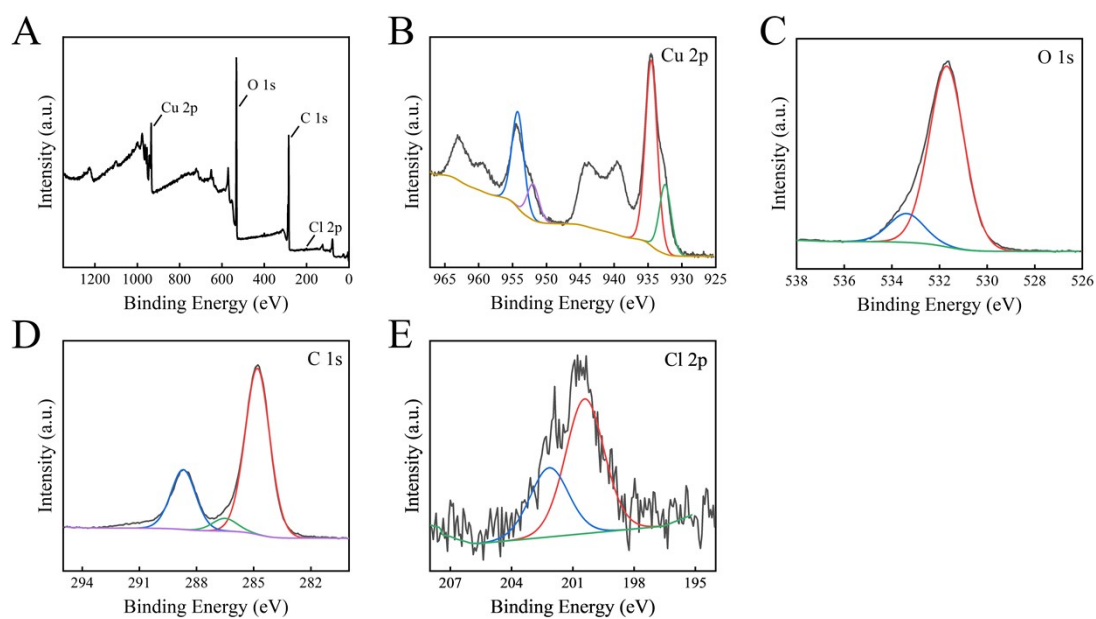

**Fig. S19.** (A) XPS spectra of HKUST-1 incubated with 2,4-DP. High-resolution (B) Cu 2p, (C) O 1s, (D) C 1s, (E) Cl 2p.

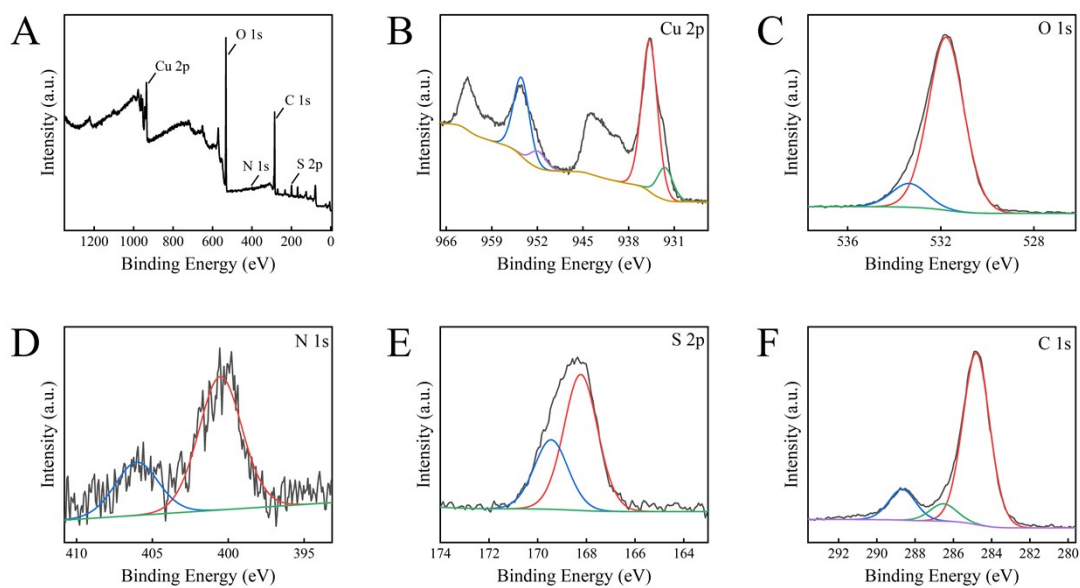

**Fig. S20.** (A) XPS spectra of Cu-SM MOF incubated with p-nitrophenol. High-resolution (B) Cu 2p, (C) O 1s, (D) N 1s, (E) S 2p, (F) C 1s.

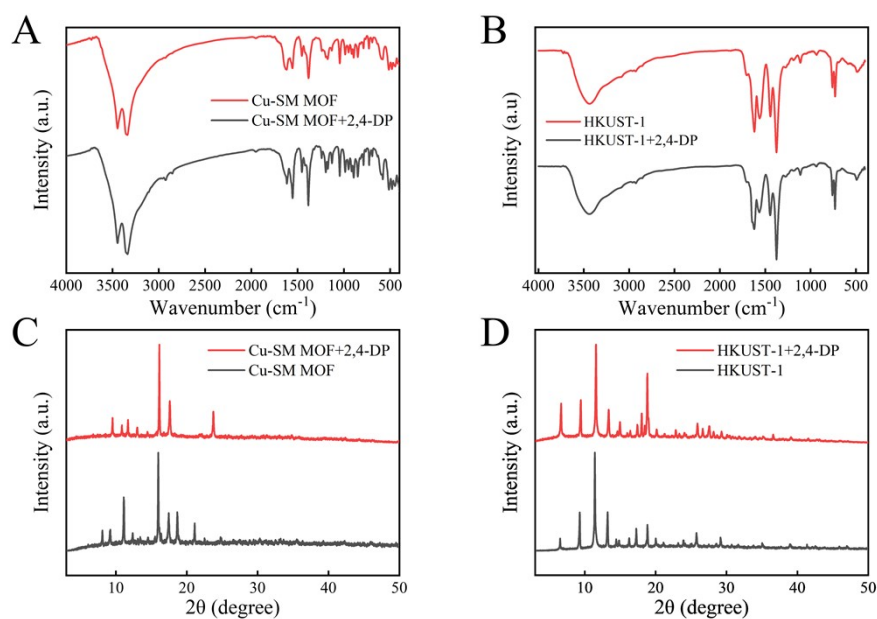

**Fig. S21.** FTIR spectrum of MOFs and that incubated with 2,4-DP. (A) Cu-SM MOF, (B) HKUST-1. PXRD patterns of MOFs and that incubated with 2,4-DP. (C) Cu-SM MOF, (D) HKUST-1.

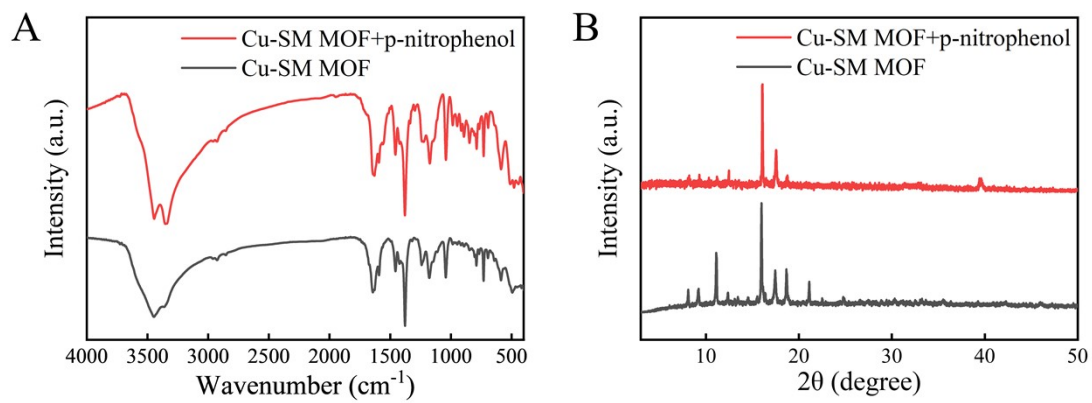

**Fig. S22.** (A) FTIR spectrum and (B) PXRD patterns of Cu-SM MOF incubated with p-nitrophenol.

**Table S1.** Experimental details regarding the LOD calculation for detection of 2,4-DP and p-nitrophenol.

|                      | $\sigma$ | $k$     | $\text{LOD}=3\sigma/k$ |
|----------------------|----------|---------|------------------------|
| <b>2,4-DP</b>        | 0.002109 | 0.01203 | 0.53 $\mu\text{M}$     |
| <b>p-nitrophenol</b> | 0.004289 | 0.00796 | 1.62 $\mu\text{M}$     |

$\sigma$ : standard deviation of blank,  $k$ : calibration curve slope from the linear relationships (Fig. 6).

**Table S2.** Detection of 2,4-DP.

| Sample             | Addition ( $\mu\text{M}$ ) | Found ( $\mu\text{M}$ ) | Recovery (%) | RSD (%) |
|--------------------|----------------------------|-------------------------|--------------|---------|
| <b>River water</b> | 20                         | 20.75                   | 103.75       | 1.0     |
|                    | 50                         | 50.62                   | 101.24       | 0.8     |
|                    | 80                         | 81.82                   | 102.27       | 4.4     |
| <b>Lake water</b>  | 20                         | 21.05                   | 105.25       | 0.4     |
|                    | 50                         | 50.28                   | 100.56       | 0.4     |
|                    | 80                         | 80.33                   | 100.41       | 2.0     |
| <b>Tap water</b>   | 20                         | 20.78                   | 103.90       | 0.8     |
|                    | 50                         | 51.21                   | 102.42       | 1.3     |
|                    | 80                         | 81.64                   | 102.05       | 0.3     |

**Table S3.** Detection of p-nitrophenol.

| Sample             | Addition ( $\mu\text{M}$ ) | Found ( $\mu\text{M}$ ) | Recovery (%) | RSD (%) |
|--------------------|----------------------------|-------------------------|--------------|---------|
| <b>River water</b> | 50                         | 48.93                   | 97.86        | 0.8     |
|                    | 100                        | 99.58                   | 99.58        | 1.4     |
|                    | 200                        | 195.57                  | 97.78        | 2.9     |
| <b>Lake water</b>  | 50                         | 51.29                   | 102.58       | 0.8     |
|                    | 100                        | 100.59                  | 100.59       | 0.8     |
|                    | 200                        | 202.28                  | 101.14       | 0.7     |
| <b>Tap water</b>   | 50                         | 48.98                   | 97.96        | 0.9     |
|                    | 100                        | 100.88                  | 100.88       | 0.1     |
|                    | 200                        | 210.16                  | 105.08       | 4.1     |

**Table S4.** Crystal data and structure refinements for Cu-SM MOF.

| Compound                                                                                        | Cu-SM MOF                                           |            |            |
|-------------------------------------------------------------------------------------------------|-----------------------------------------------------|------------|------------|
| Formula                                                                                         | C <sub>11</sub> H <sub>13</sub> CuNO <sub>7</sub> S |            |            |
| M                                                                                               | 366.82                                              |            |            |
| Temperature (K)                                                                                 | 293 (2)                                             |            |            |
| Crystal system                                                                                  | <i>trigonal</i>                                     |            |            |
| Space group                                                                                     | R-3 <i>m</i>                                        |            |            |
| <i>a</i> , <i>b</i> , <i>c</i> (Å)                                                              | 18.733 (7)                                          | 18.733 (7) | 28.218 (8) |
| $\alpha$ , $\beta$ , $\gamma$ (°)                                                               | 90                                                  | 90         | 120        |
| <i>V</i> (Å <sup>3</sup> )                                                                      | 8576 (7)                                            |            |            |
| <i>Z</i>                                                                                        | 18                                                  |            |            |
| <i>D<sub>c</sub></i> (g/cm <sup>3</sup> )                                                       | 1.279                                               |            |            |
| $\mu$ (mm <sup>-1</sup> )                                                                       | 1.279                                               |            |            |
| <i>F</i> (000)                                                                                  | 3366.0                                              |            |            |
| Reflns collected                                                                                | 24754                                               |            |            |
| Independent reflns                                                                              | 2428                                                |            |            |
| <i>R</i> (int)                                                                                  | 0.1366                                              |            |            |
| Data / restraints / parameters                                                                  | 2428/517/220                                        |            |            |
| GOF on <i>F</i> <sup>2</sup>                                                                    | 1.052                                               |            |            |
| <sup>b</sup> <i>R</i> <sub>1</sub> [ <i>I</i> >2 $\sigma$ ( <i>I</i> )], <i>wR</i> <sub>2</sub> | 0.0789, 0.2173                                      |            |            |
| <i>R</i> <sub>1</sub> [ <i>all data</i> ], <i>wR</i> <sub>2</sub>                               | 0.1009, 0.2384                                      |            |            |

**Table S5.** Bond Lengths for Cu-SM MOF.<sup>1</sup>1-X,-Y,-Z; <sup>2</sup>1+Y-X,+Y,+Z; <sup>3</sup>-Y+X,-Y,-Z; <sup>4</sup>-1/3-Y+X,-2/3+X,1/3-Z; <sup>5</sup>+X,-1+X-Y,+Z

| Atom | Atom             | Length/Å   |
|------|------------------|------------|
| Cu1  | Cu1 <sup>1</sup> | 2.6250(17) |
| Cu1  | O1 <sup>2</sup>  | 1.955(4)   |
| Cu1  | O1               | 1.956(4)   |
| Cu1  | O2 <sup>3</sup>  | 1.943(4)   |
| Cu1  | O2 <sup>1</sup>  | 1.943(4)   |
| Cu1  | O5 <sup>4</sup>  | 2.161(6)   |
| S1   | O5               | 1.441(6)   |
| S1   | O3               | 1.620(13)  |
| S1   | C6               | 1.758(9)   |
| S1   | O4               | 1.354(10)  |
| O1   | C1               | 1.255(6)   |
| O2   | C1               | 1.265(6)   |
| C2   | C3               | 1.383(6)   |
| C2   | C1               | 1.485(7)   |
| C2   | C4               | 1.385(7)   |
| C5   | C4               | 1.386(6)   |
| C5   | C4 <sup>5</sup>  | 1.386(6)   |
| C5   | C6               | 1.488(11)  |
| C10  | N2               | 1.458(10)  |
| C9   | N2               | 1.459(10)  |
| N5   | C15              | 1.444(10)  |
| N5   | C16              | 1.454(10)  |
| C13  | N4               | 1.447(10)  |
| N4   | C14              | 1.445(10)  |
| C7   | N1               | 1.447(10)  |
| N1   | C8               | 1.448(10)  |
| C12  | N3               | 1.4848(4)  |
| C11  | N3               | 1.455(7)   |

**Table S6.** Bond Angles for Cu-SM MOF.<sup>1</sup>1+Y-X,+Y,+Z; <sup>2</sup>1-X,-Y,-Z; <sup>3</sup>-1/3-Y+X,-2/3+X,1/3-Z; <sup>4</sup>-Y+X,-Y,-Z; <sup>5</sup>2/3+Y,1/3-X+Y,1/3-Z; <sup>6</sup>+X,-1+X-Y,+Z

| Atom            | Atom | Atom             | Angle/°    | Atom            | Atom | Atom             | Angle/°   |
|-----------------|------|------------------|------------|-----------------|------|------------------|-----------|
| O1 <sup>1</sup> | Cu1  | Cu1 <sup>2</sup> | 82.15(11)  | C1              | O1   | Cu1              | 125.2(3)  |
| O1              | Cu1  | Cu1 <sup>2</sup> | 82.15(11)  | C1              | O2   | Cu1 <sup>2</sup> | 120.6(3)  |
| O1 <sup>1</sup> | Cu1  | O1               | 89.8(2)    | S1              | O5   | Cu1 <sup>5</sup> | 137.2(4)  |
| O1 <sup>1</sup> | Cu1  | O5 <sup>3</sup>  | 95.17(15)  | C3              | C2   | C1               | 120.2(5)  |
| O1              | Cu1  | O5 <sup>3</sup>  | 95.17(15)  | C3              | C2   | C4               | 119.2(5)  |
| O2 <sup>4</sup> | Cu1  | Cu1 <sup>2</sup> | 86.49(12)  | C4              | C2   | C1               | 120.4(5)  |
| O2 <sup>2</sup> | Cu1  | Cu1 <sup>2</sup> | 86.49(12)  | C2              | C3   | C2 <sup>6</sup>  | 120.9(7)  |
| O2 <sup>4</sup> | Cu1  | O1 <sup>1</sup>  | 168.58(16) | C4 <sup>6</sup> | C5   | C4               | 119.1(7)  |
| O2 <sup>4</sup> | Cu1  | O1               | 89.80(16)  | C4              | C5   | C6               | 120.4(4)  |
| O2 <sup>2</sup> | Cu1  | O1               | 168.58(16) | C4 <sup>6</sup> | C5   | C6               | 120.4(4)  |
| O2 <sup>2</sup> | Cu1  | O1 <sup>1</sup>  | 89.80(16)  | O1              | C1   | O2               | 125.4(5)  |
| O2 <sup>4</sup> | Cu1  | O2 <sup>2</sup>  | 88.3(2)    | O1              | C1   | C2               | 117.0(4)  |
| O2 <sup>2</sup> | Cu1  | O5 <sup>3</sup>  | 96.23(16)  | O2              | C1   | C2               | 117.5(4)  |
| O2 <sup>4</sup> | Cu1  | O5 <sup>3</sup>  | 96.23(16)  | C2              | C4   | C5               | 120.8(5)  |
| O5 <sup>3</sup> | Cu1  | Cu1 <sup>2</sup> | 176.19(16) | C5              | C6   | S1               | 115.3(6)  |
| O5              | S1   | O3               | 104.5(5)   | C10             | N2   | C9               | 117.9(12) |
| O5              | S1   | C6               | 106.7(4)   | C15             | N5   | C16              | 119.7(12) |
| O3              | S1   | C6               | 97.6(5)    | C14             | N4   | C13              | 120.3(13) |
| O4              | S1   | O5               | 118.7(5)   | C7              | N1   | C8               | 119.7(13) |
| O4              | S1   | O3               | 115.0(8)   | C11             | N3   | C12              | 116.4(9)  |
| O4              | S1   | C6               | 111.9(5)   |                 |      |                  |           |
